# Supplementary material
Source: Springer Nature journal article supplement (https://www.springermedizin.de/resource/supplementary/13048_2013_200_MOESM2_ESM.pdf/9665124)

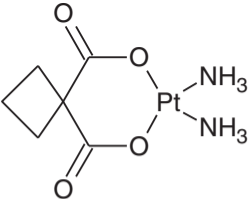

Carboplatin (CB)

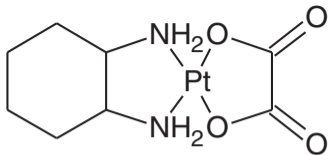

Oxaliplatin (OX)

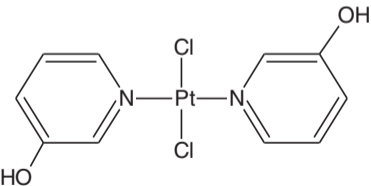

CH1

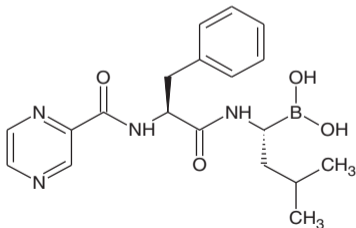

Bortezomib (BORT)

Supplement: MOESM2 [file 9665124]
